# Supplementary material
Source: PubMed Central journal article supplement (PMC4086378)
Supplement: Supp_Fig1.pdf [file Supp_Fig1.pdf]

## Supplementary Data

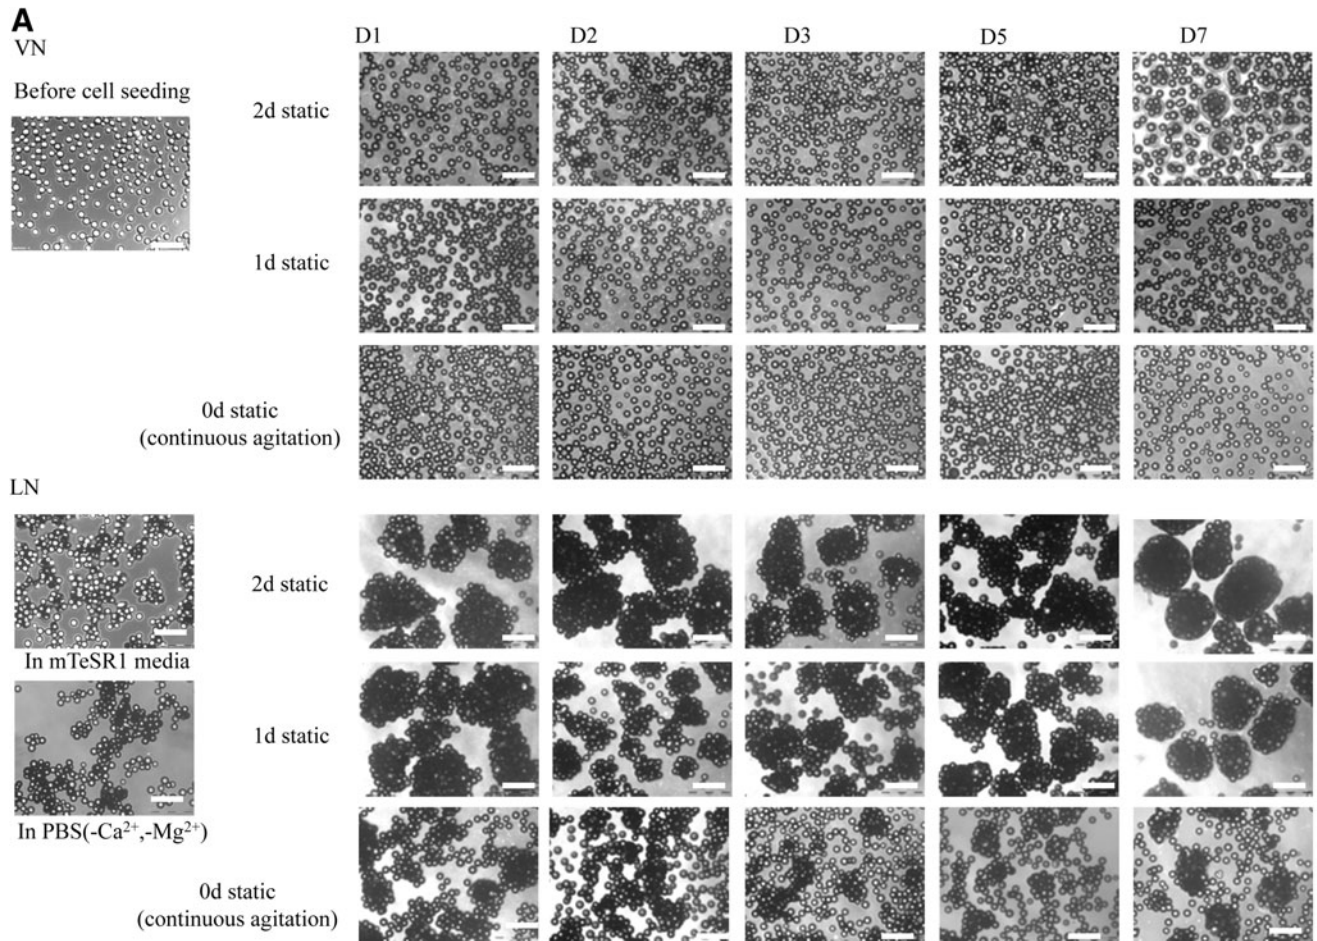

**SUPPLEMENTARY FIG. S1.** Representative images of hESC/MC aggregates over 7 days' culture in plates. HES-3 were expanded on PS MC coated with (A) VN and LN, (B) PLL+VN and PLL+LN, under each of the three agitation regimes. Scale bars are 500  $\mu$ m. LN, laminin; PLL, poly-L-lysine; VN, vitronectin.

**B**

PLL+VN

Before cell seeding

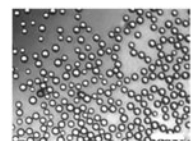

2d static

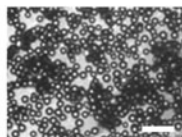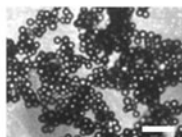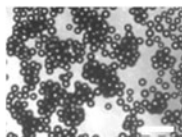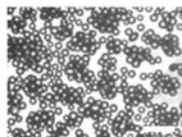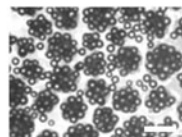

1d static

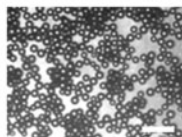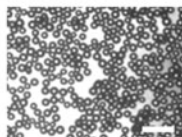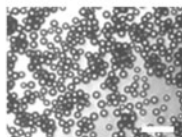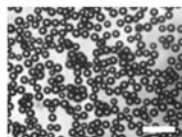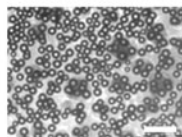

0d static  
(continuous agitation)

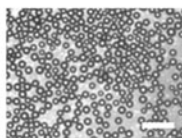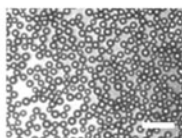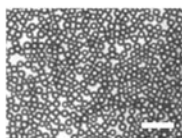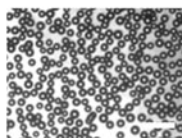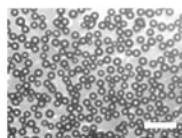

PLL+LN

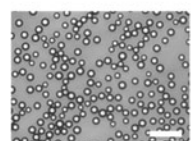

2d static

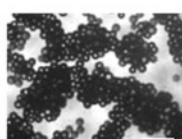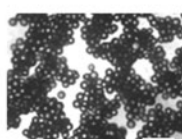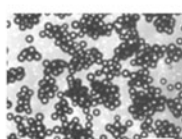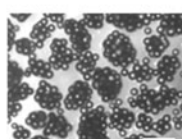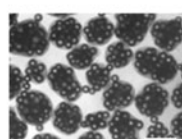

1d static

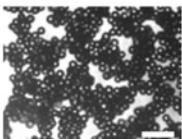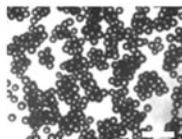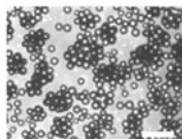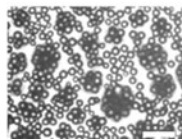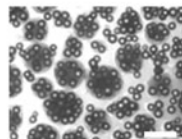

0d static  
(continuous agitation)

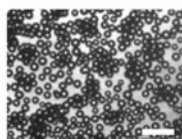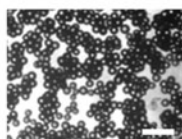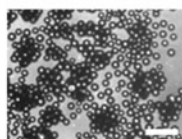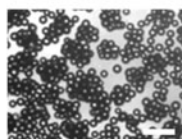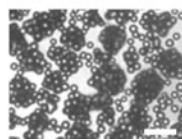

**SUPPLEMENTARY FIG. S1.** (Continued).
