# Supplementary material
Source: PubMed Central journal article supplement (PMC4086378)
Supplement: Supp_Fig2.pdf [file Supp_Fig2.pdf]

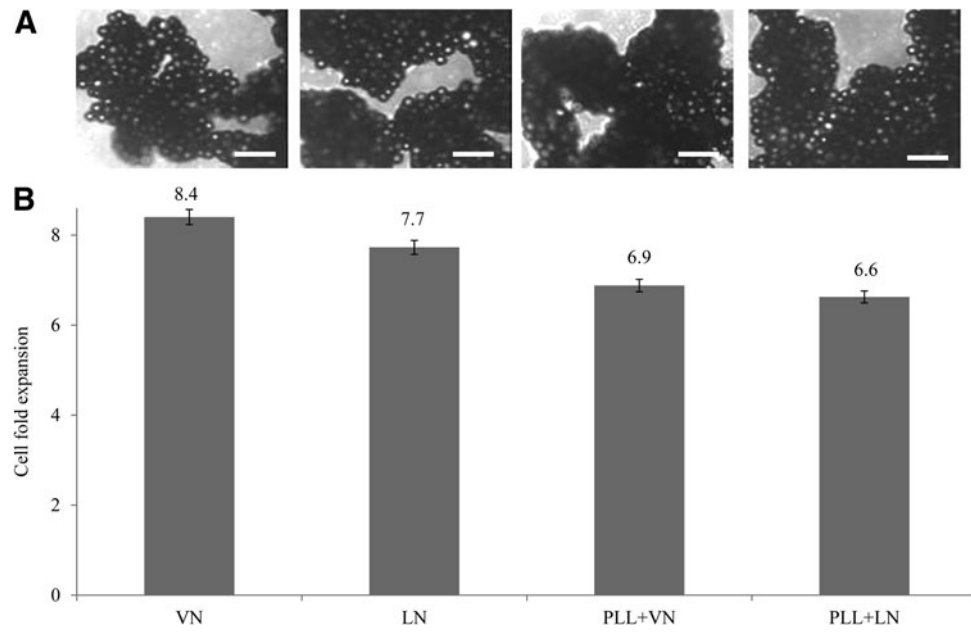

**SUPPLEMENTARY FIG. S2.** HES-3 expansion on coated PS MC in static culture at day 7. **(A)** Images show representative hESC/MC aggregates. **(B)** Histogram bars indicate fold expansion of cells. hESC, human embryonic stem cells; MC, microcarriers; PS, polystyrene.
