# Supplementary material
Source: PubMed Central journal article supplement (PMC4086378)
Supplement: Supp_Fig3.pdf [file Supp_Fig3.pdf]

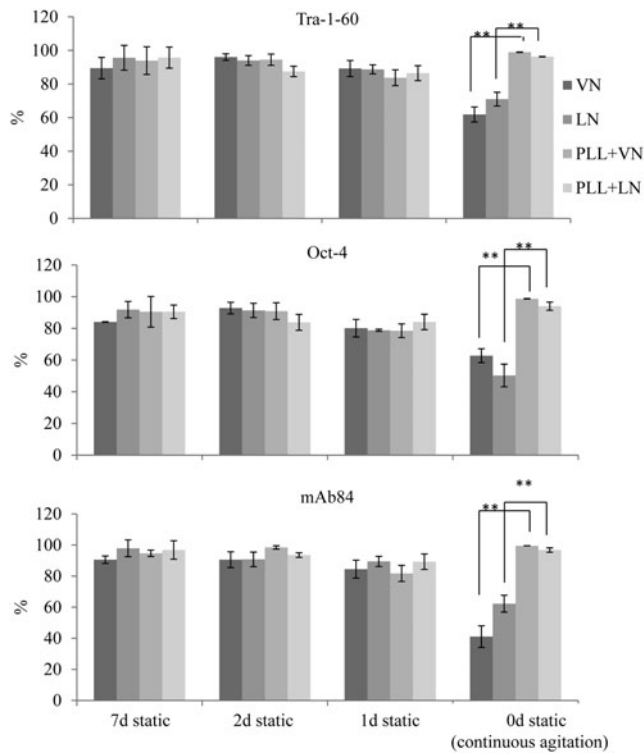

**SUPPLEMENTARY FIG. S3.** Expression of pluripotent markers, derived from FACS measurements of HES-3 cells grown on coated PS MC under each of the three agitation regimes. An apparent loss of pluripotency is observed for cells cultured on PS MC with a sole ECM protein coating, under continuous agitation. \*\* indicates  $P < 0.01$ . ECM, extracellular matrix; FACS, fluorescence-activated cell sorting.
