# Supplementary material
Source: PubMed Central journal article supplement (PMC4086378)
Supplement: Supp_Fig4.pdf [file Supp_Fig4.pdf]

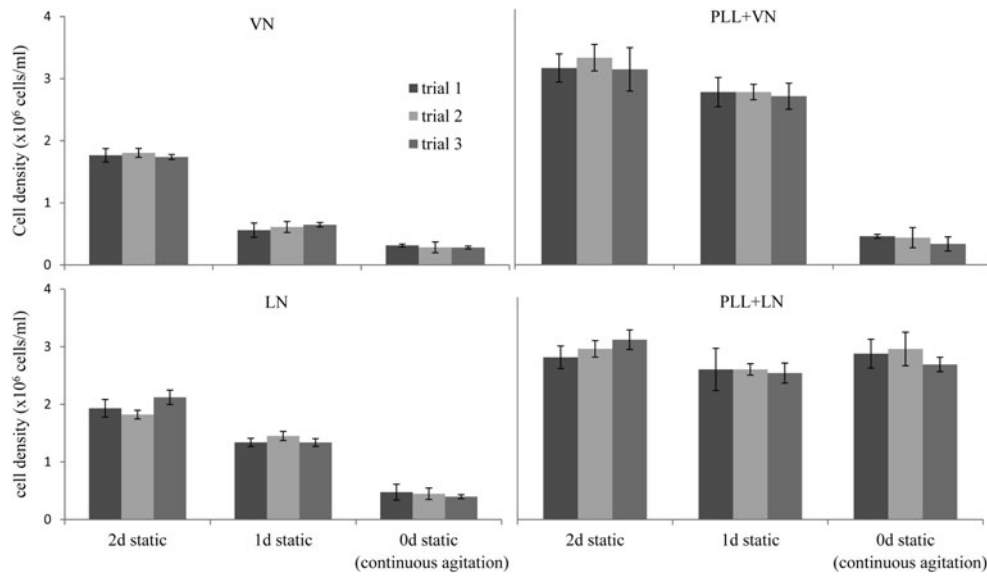

**SUPPLEMENTARY FIG. S4.** HES-3 cell density at 7 days' culture, for three individual trials, with coated PS MC under each of the three agitation regimes.
