# Supplementary material
Source: PubMed Central journal article supplement (PMC4086378)
Supplement: Supp_Fig5.pdf [file Supp_Fig5.pdf]

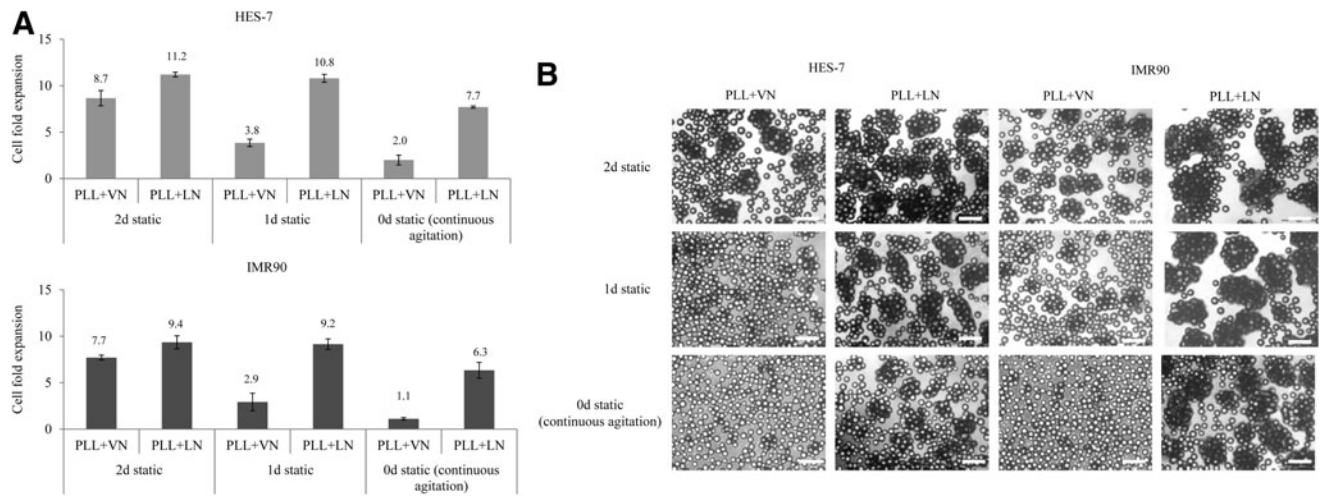

**SUPPLEMENTARY FIG. S5.** HES-7 and IMR-90, an hESC, and an iPSC line, respectively, expanded on coated PS MC under each of the three agitation regimes. **(A)** Fold expansion, and **(B)** representative phase-contrast microscopy images of hPSC/MC aggregates at 7 days' culture. Scale bars are 500  $\mu\text{m}$ . iPSC, human induced pluripotent stem cells; hPSC, human pluripotent stem cells.
