# Supplementary material
Source: PubMed Central journal article supplement (PMC4086378)
Supplement: Supp_Fig6.pdf [file Supp_Fig6.pdf]

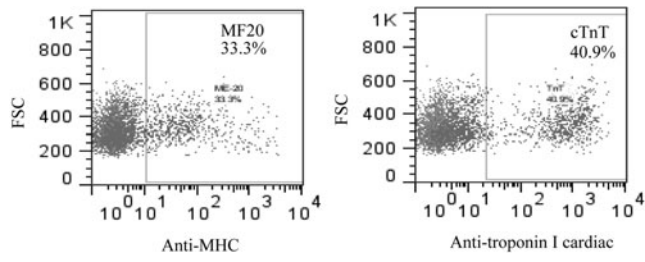

**SUPPLEMENTARY FIG. S6.** Measurement of cardiomyocytes, differentiated from HES-3 cells cultured on PS MC coated with PLL+LN. Expression of MF-20 and cTnT markers, derived from FACS data of the same cells. FSC, forward scatter; MHC (MF20), myosin heavy chain; cTnT, cardiac troponin T.
